# Supplementary material for: NMR-Based Metabolomic Analysis of Sera in Mouse Models of CVB3-Induced Viral Myocarditis and Dilated Cardiomyopathy
Source: MDPI journal article supplement (doi:10.3390/biom12010112), 2022-01-11
Supplement: s1 [file s1]

# **NMR-based metabolomic analysis of sera in mouse models of CVB3-induced viral myocarditis and dilated cardiomyopathy**

Qing Kong, Jinping Gu, Ruohan Lu, Caihua Huang, Xiaomin Hu, Yanli Liu, Xingcui Gao,

Weifeng Wu, Donghai Lin

**4 Supplementary Figures;**

**3 Supplementary Tables.**

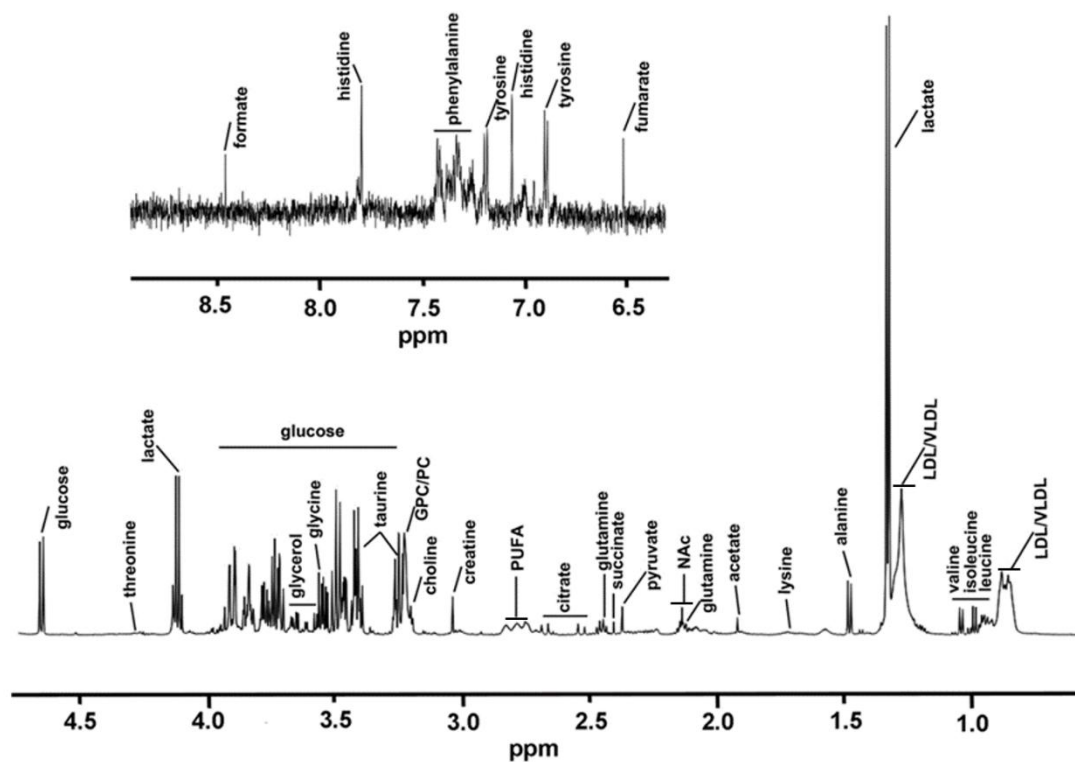

**Fig. S1.** A typical 1D  $^1\text{H}$ -CPMG NMR spectrum of the serum derived from the aVMC mouse (4.7-0.6 ppm, 9.0-6.0 ppm).

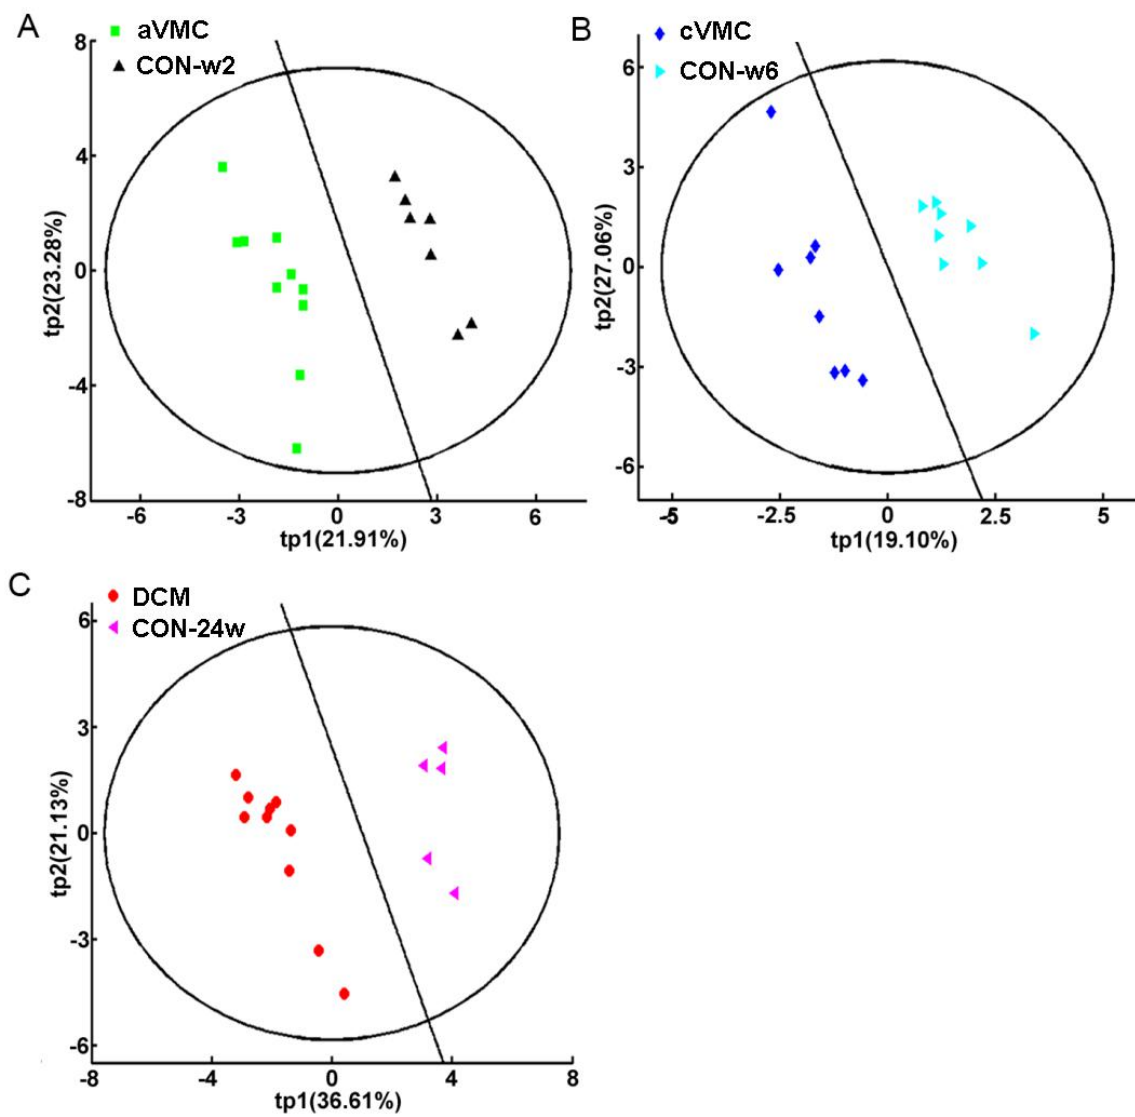

**Fig. S2.** PLS-DA scores plots of the sera derived from the mouse models. (A) aVMC vs. CON-w2; (B) cVMC vs. CON-w6; (C) DCM vs. CON-24w.

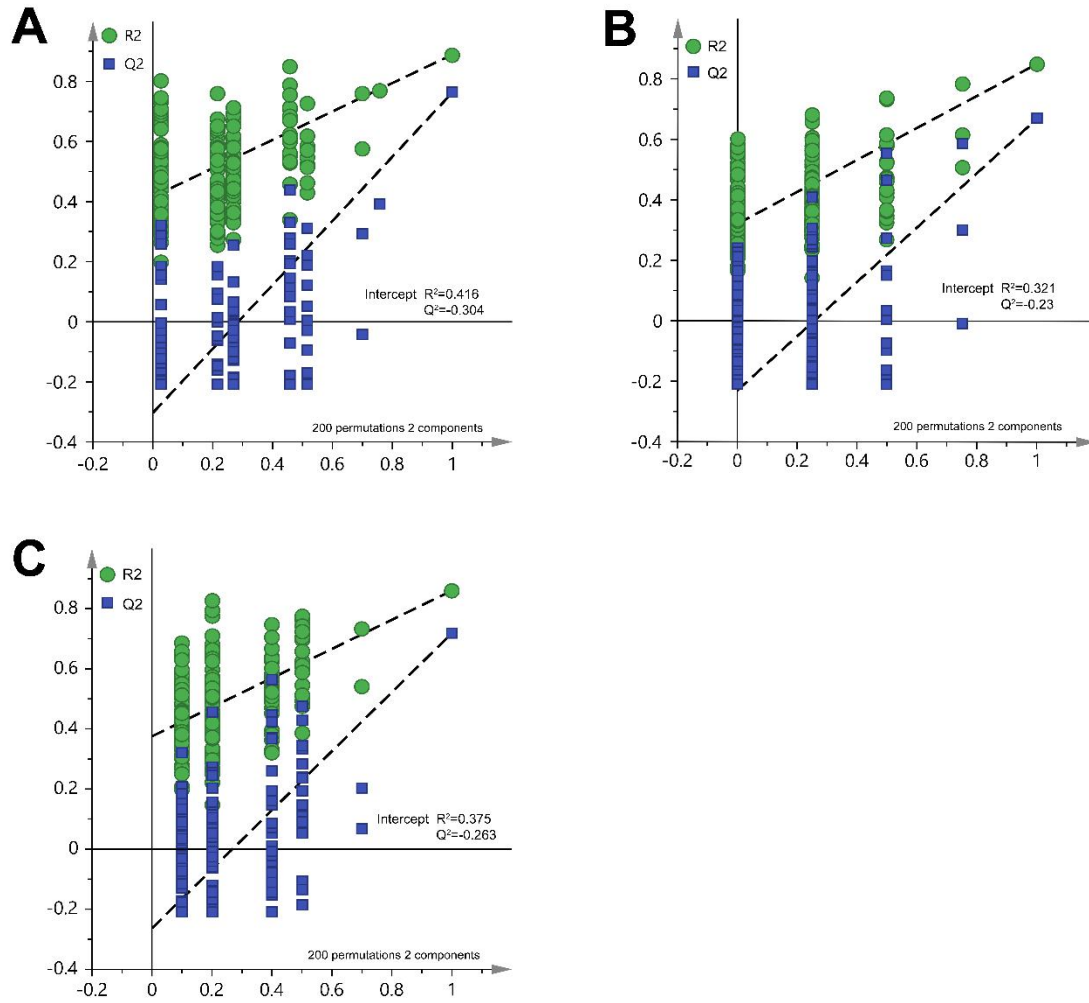

**Fig. S3.** Validation plots of the PLS-DA models for the sera generated from the permutation tests that were randomly permuted 200 times with the first two components. The green circle is  $R^2$  (cum), denoting the explained variance of the model. The blue square is  $Q^2$  (cum), standing for the predictive ability of the model. (A) aVMC vs. CON-w2; (B) cVMC vs. CON-w6; (C) DCM vs. CON-w24.

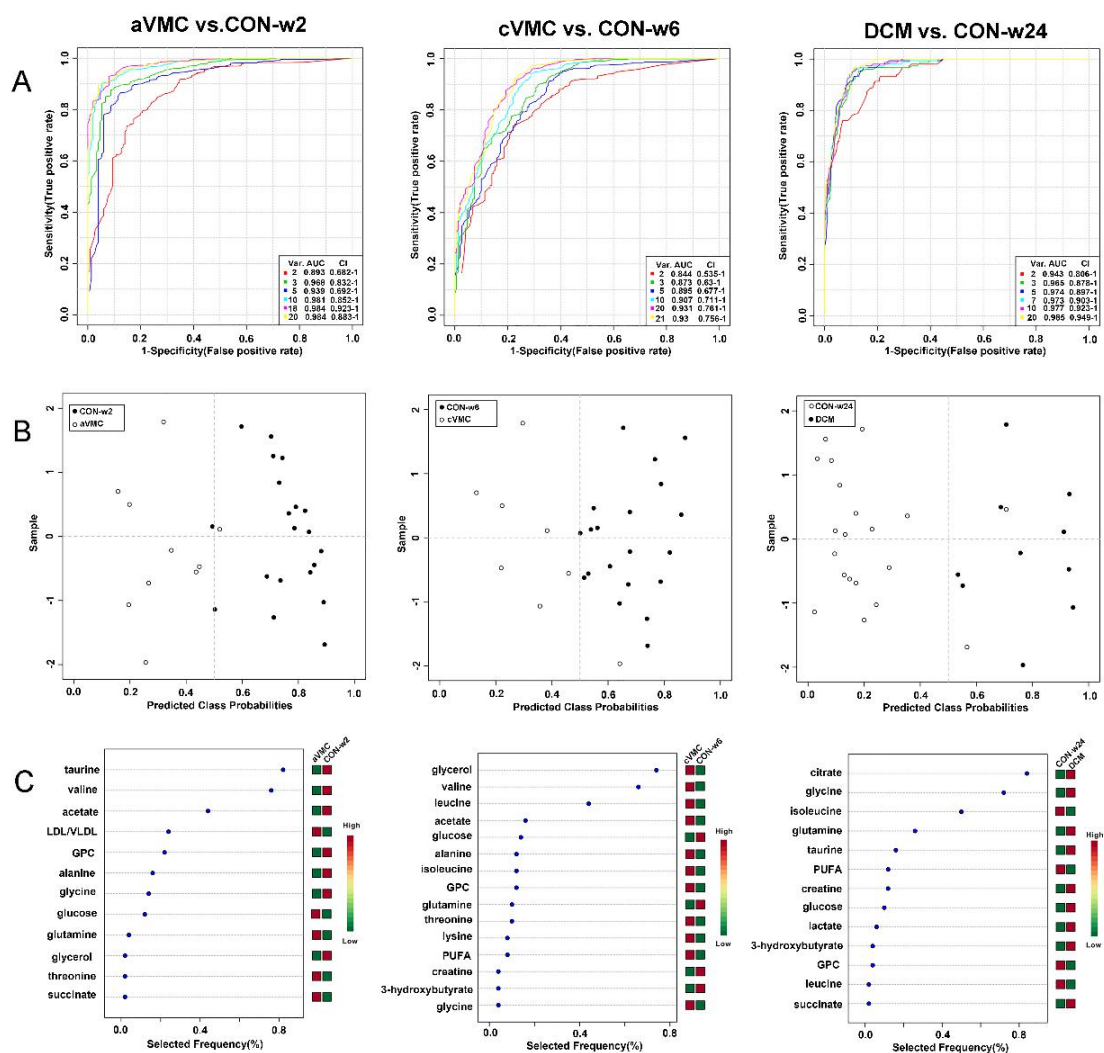

**Fig. S4.** Multivariate ROC analysis of mouse sera for identifying important metabolites. (A) ROC curves from different models built with different numbers of metabolites by using Monte-Carlo cross validation; (B) Predicted class probability for each sample using the base classifier (based on AUC of the ROC curve built with three metabolites). (C) Important metabolites ranked by the frequencies of being selected during cross validation.

**Table S1.** Resonance assignments of metabolites in 1D  $^1\text{H}$ -NMR spectra of mouse sera.

| Num. | Metabolite | $\delta$ $^1\text{H}$ (ppm) and multiplicity            | Moieties                                                                                                                                                                  |
|------|------------|---------------------------------------------------------|---------------------------------------------------------------------------------------------------------------------------------------------------------------------------|
| 1    | LDL/VLDL   | 0.89(bar), 1.28(bar)                                    |                                                                                                                                                                           |
| 2    | leucine    | 0.96(d), 0.97(d), 1.69(m),<br>1.70(m), 1.73(m), 3.73(m) | $\alpha$ -CH <sub>3</sub> , $\alpha$ -CH <sub>3</sub> , $\gamma$ -CH,<br>$\beta$ -CH <sub>2</sub> , $\alpha$ -CH                                                          |
| 3    | isoleucine | 0.94(t), 1.01(d), 1.21(m),<br>1.42(m), 2.00(m), 3.67(d) | $\delta$ -CH <sub>3</sub> , $\gamma$ -CH <sub>3</sub> ,<br>half $\gamma$ -CH <sub>2</sub> , half $\gamma$ -CH <sub>2</sub> ,<br>$\beta$ -CH, $\alpha$ -CH                 |
| 4    | valine     | 0.99(d), 1.05(d), 2.26(m),<br>3.60(d)                   | $\gamma$ -CH <sub>3</sub> , $\gamma$ -CH <sub>3</sub> , $\beta$ -CH,<br>$\alpha$ -CH                                                                                      |
| 5    | 3-HB       | 1.197(d), 2.314(m),<br>2,394(m), 4.142(m)               | $\gamma$ -CH <sub>3</sub> , $\beta$ -CH <sub>2</sub> , $\gamma$ -CH                                                                                                       |
| 6    | lactate    | 1.33(d), 4.11(q)                                        | $\beta$ -CH <sub>3</sub> , $\alpha$ -CH                                                                                                                                   |
| 7    | threonine  | 1.30(d), 3.58(d), 4.24(m)                               | $\gamma$ -CH <sub>2</sub> , $\beta$ -CH                                                                                                                                   |
| 8    | alanine    | 1.47(d), 3.78(q)                                        | $\beta$ -CH <sub>3</sub> , $\alpha$ -CH                                                                                                                                   |
| 9    | lysine     | 1.43(m), 1.49(m), 1.70(m),<br>1.91(m), 3.02(t), 3.75(t) | half $\gamma$ -CH <sub>2</sub> , half $\gamma$ -CH <sub>2</sub> ,<br>$\delta$ -CH <sub>2</sub> , $\beta$ -CH <sub>2</sub> , $\epsilon$ -CH <sub>2</sub> ,<br>$\alpha$ -CH |
| 10   | acetate    | 1.91(s)                                                 | CH <sub>3</sub>                                                                                                                                                           |
| 11   | succinate  | 2.41(s)                                                 | CH                                                                                                                                                                        |
| 12   | glutamine  | 2.13(m), 2.45(m), 3.77(t)                               | $\gamma$ -CH <sub>2</sub> , $\beta$ -CH <sub>2</sub> , $\alpha$ -CH                                                                                                       |
| 13   | citrate    | 2.51(d), 2.68(d)                                        | $\beta$ -CH <sub>2</sub>                                                                                                                                                  |
| 14   | PUFA       | 5.23-5.38(bar)                                          |                                                                                                                                                                           |
| 15   | creatine   | 3.04(s), 3.93(s)                                        | N-CH <sub>3</sub> , $\alpha$ -CH <sub>2</sub>                                                                                                                             |
| 16   | GPC/PC     | 3.23(s), 3.60(dd), 3.68(dd),                            | N-(CH <sub>3</sub> ) <sub>3</sub> , half $^1\text{CH}_2$ , $^2\text{CH}_2$ ,                                                                                              |

|    |               |                                                            |                                                                                                                                           |
|----|---------------|------------------------------------------------------------|-------------------------------------------------------------------------------------------------------------------------------------------|
|    |               | 3.87(m),<br>3.94(m), 4.33(m)                               | half $^1\text{CH}_2$ , half $^3\text{CH}_2$ , half<br>$^3\text{CH}_2$ , $^1\text{CH}_2$                                                   |
| 17 | taurine       | 3.24(t), 3.41(t)                                           | $^1\text{CH}_2$ , $^2\text{CH}_2$                                                                                                         |
| 18 | glycine       | 3.57(s)                                                    | $\alpha\text{-CH}_2$                                                                                                                      |
| 19 | glycerol      | 3.56(dd), 3.64(dd), 3.77(m)                                | half- $^1\text{CH}_2$ , half- $^3\text{CH}_2$ , $^3\text{CH}$                                                                             |
| 20 | glucose       | 5.22(d), 4.63(d), 3.9(dd),<br>3.72(m), 3.48(m), 3.22(dd)   | $\beta(\text{H}_2, \text{H}_3, \text{H}_5)$ ,<br>$\alpha(\text{H}_2, \text{H}_3, \text{H}_6)$                                             |
| 21 | N-acetyl      | 2.02-2.06(bar)                                             | $\text{CH}^3$                                                                                                                             |
| 22 | pyruvate      | 2.38(s)                                                    | $\alpha\text{-CH}_3$                                                                                                                      |
| 23 | choline       | 3.21(s), 3.51(dd), 4.04(t)                                 | $\text{N-(CH}_3)_3$ , $\alpha\text{-CH}_2$ , $\text{CH}_2\text{OH}$                                                                       |
| 24 | fumarate      | 6.51(s)                                                    | $\text{CH}$                                                                                                                               |
| 25 | tyrosine      | 3.05(dd), 3.19(dd),<br>6.92(d), 7.19(d)                    | half $\beta\text{-CH}_2$ , half $\beta\text{-CH}_2$ ,<br>$\beta\text{-CH}$ , $\alpha\text{-CH}$                                           |
| 26 | phenylalanine | 3.12(dd), 3.30(dd), 3.99(dd),<br>7.33(d), 7.37(t), 7.43(t) | $\alpha\text{-CH}$ , half $\beta\text{-CH}_2$ , half<br>$\beta\text{-CH}_2$ , $\alpha\text{-CH}$ , $\beta\text{-CH}$ , $\gamma\text{-CH}$ |
| 27 | histidine     | 7.06(s), 7.85(s)                                           | $^5\text{CH}$ , $^2\text{CH}$                                                                                                             |
| 28 | formate       | 8.46 (s)                                                   | $\text{CH}$                                                                                                                               |

Note: s (singlet), d (double), t (triplet), q (quartet), m (multiple), dd (double of double).

**Table S2.** Quantitatively comparisons of metabolite levels during the process from acute VMC to DMC based on relative integrals of metabolites calculated from 1D <sup>1</sup>H-NMR spectra of sera.

|                                | Tukey's multiple comparisons test |                    |                    | One-way ANOVA |                         |
|--------------------------------|-----------------------------------|--------------------|--------------------|---------------|-------------------------|
|                                | aVMC vs.<br>CON-w2                | cVMC vs.<br>CON-w6 | DCM vs.<br>CON-w24 | F             | p                       |
| <b>Amino acid metabolism</b>   |                                   |                    |                    |               |                         |
| leucine                        | ns                                | ns                 | ns                 | 6.884         | 9.003 ×10 <sup>-5</sup> |
| isoleucine                     | ns                                | ns                 | ns                 | 2.824         | 2.752 ×10 <sup>-2</sup> |
| valine                         | **                                | *                  | ns                 | 10.942        | 8.748×10 <sup>-7</sup>  |
| threonine                      | ns                                | ns                 | ns                 | 0.617         | 6.875×10 <sup>-1</sup>  |
| glycine                        | *                                 | ns                 | *                  | 9.686         | 3.323×10 <sup>-6</sup>  |
| lysine                         | ns                                | ns                 | ns                 | 1.833         | 1.272×10 <sup>-1</sup>  |
| alanine                        | ns                                | ns                 | ns                 | 6.952         | 8.259×10 <sup>-5</sup>  |
| taurine                        | *                                 | ns                 | ***                | 25.703        | 8.790×10 <sup>-12</sup> |
| glutamine                      | ns                                | ns                 | *                  | 6.474         | 1.520×10 <sup>-4</sup>  |
| <b>Carbohydrate metabolism</b> |                                   |                    |                    |               |                         |
| creatine                       | ns                                | ns                 | ns                 | 8.228         | 1.742×10 <sup>-5</sup>  |
| acetate                        | ns                                | ns                 | ns                 | 7.392         | 4.772×10 <sup>-5</sup>  |
| glucose                        | ns                                | ns                 | **                 | 14.081        | 4.283×10 <sup>-8</sup>  |
| lactate                        | ns                                | ns                 | ns                 | 6.445         | 1.578×10 <sup>-4</sup>  |
| succinate                      | ns                                | ns                 | *                  | 4.258         | 3.196×10 <sup>-3</sup>  |
| citrate                        | ns                                | ns                 | ***                | 24.555        | 1.776×10 <sup>-11</sup> |
| <b>Lipid metabolism</b>        |                                   |                    |                    |               |                         |
| LDL/VLDL                       | **                                | ns                 | **                 | 14.361        | 3.336×10 <sup>-8</sup>  |
| PUFA                           | ns                                | ns                 | *                  | 7.588         | 3.753×10 <sup>-5</sup>  |
| 3-HB                           | ns                                | ns                 | ns                 | 6.582         | 1.323×10 <sup>-4</sup>  |
| glycerol                       | ns                                | ns                 | **                 | 10.085        | 2.155×10 <sup>-6</sup>  |



### Choline phosphorylation metabolism

|        |    |    |    |       |                        |
|--------|----|----|----|-------|------------------------|
| GPC/PC | ns | ns | ns | 6.818 | 9.787×10 <sup>-5</sup> |
|--------|----|----|----|-------|------------------------|

**Note:** Stars \*\*\*, \*\*, \* mean that the changes of relative metabolite levels in the mouse models are highly significant ( $p<0.001$ ), very significant ( $p<0.01$ ), significant ( $p<0.05$ ) compared with those in the corresponding normal mice (aVMC *vs.* CON-w2, cVMC *vs.* CON-w6, DCM *vs.* CON-w24). Red and blue stars denote significant increase and significant decrease, respectively.

**Table S3.** Characteristic metabolites were determined by a combination of significant metabolites identified from the OPLS-Da (VIP > 1) and differential metabolites identified from the univariate analyses ( $p < 0.05$ ).

| Metabolite | aVMC vs. CON-2w | cVMC vs. CON-6w | DCM vs. CON-24w |
|------------|-----------------|-----------------|-----------------|
| acetate    | ↓               | ↑               | ↑               |
| taurine    | ↓               | ↑               | ↑               |
| LDL/VLDL   | ↑               |                 | ↓               |
| valine     | ↓               | ↑               |                 |
| glycine    | ↓               |                 |                 |
| glucose    | ↓               |                 | ↑               |
| GPC/PC     | ↓               |                 | ↓               |
| lysine     |                 | ↑               |                 |
| glycerol   |                 | ↑               |                 |
| leucine    |                 | ↑               |                 |
| glutamine  |                 | ↓               | ↑               |
| PUFA       |                 | ↑               | ↓               |
| 3HB        |                 |                 | ↑               |
| succinate  |                 |                 | ↑               |
| citrate    |                 |                 | ↑               |
| creatine   |                 |                 | ↑               |

**Note:** The upward arrow and downward arrow denote that the difference between A and B is positive (A is increased compared to B) and negative (A is decreased compared to B), respectively.
